# Supplementary material for: Identification of New Candidate Genes and Chemicals Related to Esophageal Cancer Using a Hybrid Interaction Network of Chemicals and Proteins
Source: PLoS One. 2015 Jun 9;10(6):e0129474. doi: 10.1371/journal.pone.0129474 (PMC4461353; doi:10.1371/journal.pone.0129474)
Supplement: S3 Table — (XLSX) [file pone.0129474.s004.xlsx]

## Sheet: Sheet1
S3 Table. The enrichments of 164 significant candidate genes on KEGG pathways
Category	Term	Count	%	PValue	Genes	List Total	Pop Hits	Pop Total	Fold Enrichment	Bonferroni	Benjamini	FDR
KEGG_PATHWAY	hsa05200:Pathways in cancer	23	14.1975	1.29369e-07	WNT5A, FGFR2, FGF6, DVL2, EPAS1, MSH2, MMP9, WNT3A, CREBBP, FASLG, FADD, ITGB1, MMP2, ARNT, CTNNB1, WNT2, JUP, WNT7B, JUN, NTRK1, WNT7A, AXIN1, FN1	98	328	5085	3.63847	1.43598e-05	1.43598e-05	0.000146408
KEGG_PATHWAY	hsa05217:Basal cell carcinoma	8	4.93827	7.09865e-05	DVL2, WNT2, WNT5A, WNT7B, WNT3A, WNT7A, CTNNB1, AXIN1	98	55	5085	7.54731	0.00784882	0.00393214	0.0803067
KEGG_PATHWAY	hsa04310:Wnt signaling pathway	12	7.40741	0.000121362	DVL2, WNT2, WNT5A, WNT7B, CSNK2A1, JUN, WNT3A, CREBBP, LRP6, WNT7A, CTNNB1, AXIN1	98	151	5085	4.12353	0.0133816	0.00448059	0.13726
KEGG_PATHWAY	hsa04010:MAPK signaling pathway	14	8.64198	0.00151617	FGFR2, FGF6, FASLG, MAPKAPK2, FLNA, ATF2, DUSP1, MAPK14, NTRK1, JUN, PLA2G2A, PAK1, GADD45A, MAP2K6	98	267	5085	2.72071	0.155003	0.0412314	1.7025
KEGG_PATHWAY	hsa04916:Melanogenesis	8	4.93827	0.00263175	DVL2, WNT2, WNT5A, WNT7B, WNT3A, CREBBP, WNT7A, CTNNB1	98	99	5085	4.19295	0.253612	0.0568235	2.93827
KEGG_PATHWAY	hsa04340:Hedgehog signaling pathway	5	3.08642	0.0214478	WNT2, WNT5A, WNT7B, WNT3A, WNT7A	98	56	5085	4.63284	0.90988	0.330418	21.7583
KEGG_PATHWAY	hsa04670:Leukocyte transendothelial migration	7	4.32099	0.024504	ITGAL, MAPK14, MMP9, ITGB1, MMP2, VASP, CTNNB1	98	118	5085	3.07809	0.936316	0.325243	24.4797
KEGG_PATHWAY	hsa04210:Apoptosis	6	3.7037	0.024595	CFLAR, RIPK1, NTRK1, FASLG, FADD, ATM	98	87	5085	3.57847	0.936972	0.29215	24.5594
KEGG_PATHWAY	hsa00980:Metabolism of xenobiotics by cytochrome P450	5	3.08642	0.0268884	GSTM1, GSTA1, GSTA3, CYP1A1, CYP2E1	98	60	5085	4.32398	0.951465	0.285494	26.5426
KEGG_PATHWAY	hsa04110:Cell cycle	7	4.32099	0.0313905	ANAPC2, RAD21, CREBBP, PCNA, ZBTB17, GADD45A, ATM	98	125	5085	2.90571	0.970992	0.298139	30.2982
KEGG_PATHWAY	hsa04510:Focal adhesion	9	5.55556	0.0370451	ITGA5, JUN, ITGB7, PAK1, ITGB1, VASP, FLNA, CTNNB1, FN1	98	201	5085	2.32333	0.984855	0.316766	34.7671
KEGG_PATHWAY	hsa04912:GnRH signaling pathway	6	3.7037	0.0384367	MAPK14, JUN, PLA2G2A, MMP14, MMP2, MAP2K6	98	98	5085	3.1768	0.987101	0.304102	35.826
KEGG_PATHWAY	hsa05211:Renal cell carcinoma	5	3.08642	0.0438333	EPAS1, JUN, CREBBP, PAK1, ARNT	98	70	5085	3.70627	0.993094	0.317996	39.7861
KEGG_PATHWAY	hsa04810:Regulation of actin cytoskeleton	9	5.55556	0.0516619	FGF6, FGFR2, ITGAL, PFN2, ITGA5, ITGB7, PAK1, ITGB1, FN1	98	215	5085	2.17205	0.997227	0.343324	45.1357
KEGG_PATHWAY	hsa05412:Arrhythmogenic right ventricular cardiomyopathy (ARVC)	5	3.08642	0.0563253	JUP, ITGA5, ITGB7, ITGB1, CTNNB1	98	76	5085	3.41367	0.998396	0.348844	48.1127
KEGG_PATHWAY	hsa05210:Colorectal cancer	5	3.08642	0.0756541	DVL2, MSH2, JUN, CTNNB1, AXIN1	98	84	5085	3.08856	0.999839	0.420602	58.9469
KEGG_PATHWAY	hsa03010:Ribosome	5	3.08642	0.0836663	RPL23, RPS29, RPL8, RPS12, RPS23	98	87	5085	2.98205	0.999939	0.43476	62.7988
